# 1 **Genetic and ecological drivers of molt in a migratory bird**

2

3 Andrea Contina<sup>\*,1,2</sup>, Christen M. Bossu<sup>\*,3</sup>, Daniel Allen<sup>4</sup>, Michael B. Wunder<sup>1</sup> and Kristen C.  
4 Ruegg<sup>3</sup>

5

6 <sup>1</sup> Department of Integrative Biology, University of Colorado Denver, Denver, CO 80204, USA

7 <sup>2</sup> Department of Integrative Biology, University of Texas at Austin, Austin, TX 78705, USA

8 <sup>3</sup> Biology Department, Colorado State University, Fort Collins, CO 80521, USA

9 <sup>4</sup> Department of Ecosystem Science and Management, The Pennsylvania State University,

10 University Park, PA 16802, USA

11 \* Equal contribution

12 *Corresponding author:* Andrea Contina; [aconтина@utexas.edu](mailto:aconтина@utexas.edu)

13

14 *Running title:* Genetic and ecological drivers of molt

15

16 *Keywords:* molt-migration, genomics, GWAS, GEA, buntings, stable isotope

17

18 *Author Contributions:* A.C., K.R., and C.B. conceived the study; A.C., performed the isotopic  
19 analysis with contribution from M.W. and D.A.; C.B. performed the population genetic and  
20 landscape genetic analyses with contributions from A.C. and K.R.; K.R., A.C., and C.B. wrote  
21 the paper with contributions from all authors.

22 *Data Accessibility:* Painted Bunting population-level RAD-Seq data are available through

23 NCBI's Sequence Read Archive [SRA NUMBER].

24 **ABSTRACT**

25 The ability of animals to sync the timing and location of molting (the replacement of hair, skin,  
26 exoskeletons or feathers) with peaks in resource availability has important implications for their  
27 ecology and evolution. In migratory birds, the timing and location of pre-migratory feather  
28 molting, a period when feathers are shed and replaced with newer, more aerodynamic feathers,  
29 can vary within and between species. While hypotheses to explain the evolution of intraspecific  
30 variation in the timing and location of molt have been proposed, little is known about the genetic  
31 basis of this trait or the specific environmental drivers that may result in natural selection for  
32 distinct molting phenotypes. Here we take advantage of intraspecific variation in the timing and  
33 location of molt in the iconic songbird, the Painted Bunting (*Passerina ciris*) to investigate the  
34 genetic and ecological drivers of distinct molting phenotypes. Specifically, we use genome-wide  
35 genetic sequencing in combination with stable isotope analysis to determine population genetic  
36 structure and molting phenotype across thirteen breeding sites. We then use genome-wide  
37 association analysis (GWAS) to identify a suite of genes associated with molting and pair this  
38 with gene-environment association analysis (GEA) to investigate potential environmental drivers  
39 of genetic variation in this trait. Associations between genetic variation in molt-linked genes and  
40 the environment are further tested via targeted SNP genotyping in 25 additional breeding  
41 populations across the range. Together, our integrative analysis suggests that molting is in part  
42 regulated by genes linked to feather development and structure (*GLI2* and *CSPG4*) and that  
43 genetic variation in these genes is associated with seasonal variation in precipitation and aridity.  
44 Overall, this work provides important insights into the genetic basis and potential selective forces  
45 behind phenotypic variation in what is arguably one of the most important fitness-linked traits in  
46 a migratory bird.

47

48

49

50

51

52

## 53 INTRODUCTION

54 Seasonal migration is energetically costly, often requiring extensive morphological and  
55 physiological changes each year to prepare for long-distance movements. Molting, defined as the  
56 replacement of hair, feathers, skin, and/or exoskeletons to make way for new growth, is one such  
57 morphological change that can help prepare animals for long-distance migratory journeys (e.g.,  
58 smoltification in fish<sup>1</sup>, exoskeleton molting in insects<sup>2</sup>, and feather molting in birds<sup>3</sup>), but can  
59 also come at the cost of elevated energetic demands, increased risk of predation, and increased  
60 exposure to environmental conditions. In migratory birds, the potential costs associated with pre-  
61 migratory feather molting, a period when feathers are shed and replaced with newer, more  
62 aerodynamic feathers<sup>4-6</sup>, are thought to be outweighed by the benefits of increasing flight  
63 efficiency during migration<sup>7</sup>. However, feathers are also critical to providing birds with  
64 insulation from thermal extremes (either too hot or too cold) and, as a result, avoidance of  
65 extreme temperatures during feather molting is important to survival<sup>8,9</sup>. While previous research  
66 has demonstrated that intraspecific variation in the timing and location of molt in birds is at least  
67 in partly genetically determined<sup>10-12</sup>, very little is known about the genetic basis of feather  
68 molting or the environmental factors which select for variation in this key fitness-linked trait.

69         The timing and location of feather molting in birds is known to vary within and between  
70 species in ways that minimize energetic costs and maximize gains of increased flight efficiency.  
71 Most migratory passerines complete their molt on the breeding grounds prior to autumn  
72 migration, separating the energetically costly stages of migration and molting into different  
73 periods of the year. However, some migratory birds have evolved a strategy referred to as molt-  
74 migration, where birds first migrate south to take advantage of resource pulses at stop-over  
75 locations to complete their molt before heading to wintering areas<sup>13</sup>. One hypothesis proposed to

76 explain the evolution of molt-migratory behavior is the push-pull hypothesis. For migratory birds  
77 breeding in Western North America, the push-pull hypothesis posits that molt-migratory  
78 behavior evolved in response to migratory birds being pushed away from breeding sites in late  
79 summer due to dry conditions and an associated lack of food resources and simultaneously  
80 pulled towards monsoon regions of western Mexico to take advantage of pulses in resource  
81 availability to complete their molt<sup>14</sup>. Thus, in addition to allowing migrants to take advantage of  
82 additional food resources in southern regions, molt-migration may allow birds to avoid exposure  
83 to heat stress during the molting period when the temperature regulating benefits of feathers are  
84 weakened. If the push-pull hypothesis holds true, we predict that seasonality and changes in  
85 precipitation across the breeding range will be positively associated with genetic variation in  
86 genes linked to molting, resulting in a higher proportion of molt-migrant associated genotypes in  
87 regions characterized by higher seasonality and more extreme summer temperatures.

88         It has also been hypothesized that intraspecific variation in molting phenotypes (i.e.,  
89 timing of molt and direction of migration to stopover or wintering grounds) may contribute to the  
90 evolution of and the maintenance of migratory divides, regions of overlap between distinct  
91 populations with divergent migratory strategies<sup>15,16</sup>, but data supporting this mechanism is  
92 limited. For example, differences in migratory direction may result in post-mating reproductive  
93 isolation via reduced fitness of hybrids that migrate along intermediate routes<sup>17-20</sup>. Alternatively,  
94 hybrids with intermediate molting behavior may suffer reduced fitness if they molt in suboptimal  
95 locations<sup>21</sup>. If differences in molting behavior contribute to reproductive isolation, we would  
96 expect to see evidence of reduced gene flow associated with transitions between distinct molting  
97 behavior, but empirical support for this idea has been limited partially due to difficulties with  
98 identifying the molting phenotype of birds captured on their breeding grounds<sup>22</sup>.

99           While molting strategies have historically been defined on a species level, new research  
100 tools for assessing the molt locations of individuals have revealed previously unrecognized levels  
101 of intraspecific variation in molting strategies<sup>23,24</sup>. For example, estimates of the geographic area  
102 and the environmental characteristics (e.g., type of dominant vegetation, proximity to the ocean,  
103 or elevation) of a molting individual can be determined from a single feather using stable isotope  
104 analysis (SIA). Once formed, keratinous tissues such as hair, feather or nail are metabolically  
105 inert and so their isotopic ratio of common elements such as hydrogen, carbon, and nitrogen,  
106 reflect the environmental conditions of where they were grown<sup>25,26</sup>. Thus, SIA has become one  
107 of the forefront techniques in avian ecology studies and offers an indirect approach for  
108 describing individual variation in the molt strategies<sup>5,27,28</sup>. Now that the research tool is in place  
109 for revealing the extent of intra-species variation in molting preferences and environmental  
110 conditions, we can begin to ask questions about the genetic and environmental drivers of this  
111 complex trait within species.

112           Next-generation sequencing has facilitated the ability to assess genetic and environmental  
113 drivers of complex traits using a variety of techniques that were formerly only available to  
114 researchers working on model systems<sup>29,30</sup>. In particular, genome-wide association studies  
115 (GWAS) allow for the identification of genetic variants significantly associated with a phenotype  
116 of interest<sup>31</sup>, while gene-environment correlation analysis (GEA) analyses are used to identify  
117 putative environmental drivers of local adaptation. Given the similar goals of each approach and  
118 the fact that natural selection on complex life history traits is generally driven by environmental  
119 variation across space, a method that combines the two approaches has the potential to identify  
120 environmental drivers of a specific complex phenotype rather than environmental drivers of local  
121 adaptation more generally. Here we adopt a two-step approach that first uses GWAS to identify

122 candidate loci underlying molt-migratory behavior in a migratory songbird, the Painted Bunting  
123 (*Passerina ciris*), and then uses GEA to identify environmental drivers of genetic variation  
124 linked to this phenotype.

125         The Painted Bunting is a songbird which breeds in two disjunct populations across  
126 southwestern United States (U.S.) and northwestern Mexico (larger western population) and  
127 along the Atlantic coast of the U.S. (smaller eastern population) from Florida to North  
128 Carolina<sup>32</sup>. It is an ideal system in which to investigate the genetic and ecological drivers of  
129 intraspecific variation of molt because field observations, tracking studies, and isotope analysis  
130 have documented clear differences in molting strategies across the range<sup>33–35</sup>. More specifically,  
131 previous work has shown that southwestern breeding birds are molt-migrants that stopover in  
132 western Mexico in the fall to complete their molt, while eastern populations follow the more  
133 common strategy of molting at the breeding grounds before migrating to southern latitudes for  
134 the winter<sup>33,36,37</sup>. However, within the southwestern region, the variation of the molt-migratory  
135 phenotype and its potential role in local adaptation and gene flow between populations exhibiting  
136 distinct molting phenotypes have not yet been described. Here we identify variation in hydrogen  
137 stable isotope values extracted from feathers as a proxy for environmental molting conditions  
138 experienced by individuals sampled across the breeding range (e.g., environments near the  
139 breeding ground or farther away) and then pair this approach with GWAS to reveal genetic  
140 variation associated with molting behavior. We then integrate GWAS and GEA analyses to test  
141 whether the environmental drivers of molt-linked genetic variation are in keeping with the push-  
142 pull hypothesis.

143

144

## 145 **METHODS**

### 146 *Sample collection and DNA isolation*

147 We compiled DNA samples from 192 individuals from 13 populations across the Painted  
148 Bunting's breeding range. At each site, birds were captured using targeted mist-netting and blood  
149 samples were collected via brachial venipuncture and preserved in Queen's lysis buffer<sup>38</sup>.  
150 Importantly, population sampling for genetic analysis focused on 13 populations spanning a  
151 range of hypothesized differences in molting behavior of the Painted Bunting (Figure 1; Table  
152 S1). Further, we included additional 261 genetic samples from 13 sites that overlap with the  
153 RAD-seq data set in addition to 12 new breeding populations to validate associations between  
154 allele frequencies and environmental variables in key candidate loci identified via RAD-seq  
155 alone. DNA from all samples was purified using the Qiagen<sup>TM</sup> Dneasy Blood and Tissue  
156 extraction kit and quantified using the Qubit® dsDNA HS Assay kit (Thermo Fisher Scientific).  
157 Remaining blood samples were cataloged and stored for future use in -80°C freezers at the  
158 Conservation Genomic Laboratory at Colorado State University.

159

### 160 *RAD sequencing*

161 Genome scans were conducted using high-density RAD-Seq on all 192 individuals following a  
162 modified version of the bestRAD library preparation protocol<sup>39,40</sup>. In short, DNA was normalized  
163 to a final concentration of 100ng in a 10ul volume, digested with restriction enzyme SBfl (New  
164 England Biolabs, NEB). The fragmented DNA was then ligated with SBfl specific adapters  
165 prepared with biotinylated ends and samples were pooled and cleaned using 1X Agencourt®  
166 AMPure XP beads (Beckman Coulter). Pooled and clean libraries were sheared to an average  
167 length of 400bp with 10 cycles on the Bioruptor NGS sonicator (Diagenode) to ensure

168 appropriate length for sequencing and an Illumina NEBNext Ultra DNA Library Prep Kit (NEB)  
169 was used to repair blunt ends and ligate on NEBNext Adaptors to the resulting DNA fragments.  
170 Agencourt® AMPure XP beads (Beckman Coulter) were then used to select DNA fragments  
171 with an average length of 500bp, libraries were enriched with PCR, and cleaned again with  
172 Agencourt® AMPure XP beads. The resulting libraries were sequenced on two lanes of an  
173 Illumina HiSeq 2500 at the UC Davis Genome Center using 250 bp paired-end sequencing.

174 We used the program *stacks*<sup>41</sup> to demultiplex, filter and trim adapters from the data with  
175 the *process\_radtags* function and remove duplicate read pairs using the *clone\_filter* function. We  
176 mapped the processed sequences to the annotated genome of a closely related relative, the  
177 Medium Ground finch (MEGR), *Geospiza fortis*<sup>42</sup> (NCBI Assembly ID: 402638 (GeoFor\_1.0)).  
178 This genome is from a female individual sequenced at 115X coverage with HiSeq data. The  
179 genome is 1.07 Gb, and scaffold N50 is 5.2 Mb. We mapped the processed reads to the MEGR  
180 genome using *bowtie2*<sup>43</sup> and detected variants using the program HaplotypeCaller in the Genome  
181 Analysis Toolkit (*gatk*)<sup>44,45</sup>. For initial filtering, we used *vcftools*<sup>46</sup> to remove indels, non-  
182 biallelic SNPs, and low quality and rare variants (genotype quality 20; coverage depth 10; minor  
183 allele frequency 0.03). This initial filtering resulted in 86,347 loci in 192 individuals. The final  
184 number of SNPs and individuals to be retained for the subsequent analyses was assessed by  
185 visualizing the tradeoff between discarding low-coverage SNPs and discarding individuals with  
186 missing genotypes using custom scripts within the R-package *genoscapeRtools*<sup>47</sup>. The final  
187 dataset included 41,786 variants in 124 individuals.

188

189 ***Population structure***



190 To determine whether population structure was associated with a transition between molting  
191 phenotypes, we assessed patterns of population structure using the program ADMIXTURE<sup>48</sup>, for  
192  $K = 1$  to  $K = 6$  putative clusters, with a model that accounted for admixture between populations  
193 and correlated allele frequencies. We ran 5 iterations for each value of  $K$ , with a burn-in period  
194 of 50,000, and a total run length of 150,000 generations. To determine the optimal number of  
195 genetic clusters we used the cross-validation method, a process of systematically withholding  
196 data points to identify the best  $K$  value<sup>49</sup>. We used this algorithm to detect the uppermost  
197 hierarchical level of structure across the Painted Bunting breeding range and visually inspected  
198 subsequent structure plots using *pophelper*<sup>50</sup> in R to identify regions where geographic barriers  
199 to gene flow exist and/or where admixture homogenizes population structure.

200

### 201 *Stable isotope analysis*

202 To identify clusters of individuals based on their stable isotope values of hydrogen ( $\delta^2\text{H}$ ) in  
203 feathers during molting, we collected wing feathers from 166 birds of which 114 individuals  
204 were also sequenced. We washed the ninth primary wing feathers in a 2:1 solution of  
205 Chloroform-Methanol following the protocol detailed in Chew et al. (2019). This step and  
206 additional washes in a 30:1 solution of deionized water and detergent ensured that debris and oil  
207 contaminants were removed from the samples. Feather washing was followed by a drying step of  
208 48 hours at room temperature and cutting to about 200  $\mu\text{g}$  ( $\pm 10 \mu\text{g}$ ) of the distal feather tip  
209 packaged into a silver capsule. Before mass spectrometry analysis, we stored our feather samples  
210 for a minimum of three weeks to allow for equilibration of exchangeable H to the laboratory  
211 environment (Wassenaar and Hobson 2003).

212 We ran all the samples through a Thermo Scientific™ TC/EA high temperature  
213 conversion elemental analyzer interfaced with a Thermo Scientific™ Delta V Advantage Isotope  
214 Ratio Mass Spectrometer via a Thermo Scientific™ ConFlo IV Continuous Flow Interface. We  
215 report  $\delta^2\text{H}$  values as mean  $\pm$  SD in delta notation of parts per million (‰) from the standards  
216 ( $\delta^2\text{H}_{\text{sample}} = [(R_{\text{sample}}/R_{\text{standard}}) - 1]$ ) comparative to the Vienna Standard Mean Ocean Water  
217 [VSMOW]. We used Caribou Hoof Standard ( $\delta^2\text{H}_{\text{CHS}} = -197.0$  ‰) and Kudu Horn Standard  
218 ( $\delta^2\text{H}_{\text{KHS}} = -54.1$  ‰) as external calibration standards (USGS - United States Geological Survey,  
219 Reston Stable Isotope Laboratory, Virginia, USA) and brown-headed cowbird feathers ( $\delta^2\text{H}_{\text{BHCO}}$   
220 =  $-40.9$  ‰) as an internal blind standard. These standards were run after every 10 samples, and  
221 all samples were analyzed across three separate runs on the instrument. The absolute errors (‰)  
222 for all three standards across all runs ( $n = 12$  combined) were: CHS, mean = 1.3, SD = 1.3; KHS,  
223 mean = 1.3, SD = 0.6; and BHCO, mean = 1.4, SD = 1.2.

224 To explore variation in molting strategy across individuals, we extracted stable isotope  
225 values of hydrogen in precipitation ( $\delta^2\text{H}_{\text{p}}$ ) at each sampling site<sup>51</sup> and then subtracted the stable  
226 isotope values of hydrogen in feathers ( $\delta^2\text{H}_{\text{f}}$ ) collected from each individual at that site. Thus, we  
227 computed a simple differential index ( $\delta^2\text{H}_{\text{diff}}$ ) to estimate whether the keratinous tissue of each  
228 individual feather was grown at or nearby the sampling location:

229

$$230 \quad \delta^2\text{H}_{\text{diff}} = \delta^2\text{H}_{\text{p}} - \delta^2\text{H}_{\text{f}}$$

231

232 We assumed that  $\delta^2\text{H}_{\text{diff}}$  values close to zero indicated molting near the sampling  
233 location, while  $\delta^2\text{H}_{\text{diff}}$  values diverging from zero indicated molting farther away from the  
234 sampling site.

## 235 *Genome-wide association analysis (GWAS) of molting phenotype*

236 We used two genome-wide association study (GWAS) analyses to identify loci associated with  
237 molting phenotypes defined by stable isotope groupings. We used a 13.7‰ cutoff to delimit six  
238 groups ranging from individuals with extremely negative  $\delta^2\text{H}$  values to less negative or nearly  
239 positive  $\delta^2\text{H}$  values, corresponding to birds molting in different environments. The resultant  
240 clusters derive from an ad hoc procedure, but they are centered on differences of more than 12‰  
241 which has been recognized to be ecologically meaningful<sup>25,34,52</sup>. After the samples were grouped  
242 based on isotopic differences, we conducted a Bayesian sparse linear mixed model in GEMMA  
243 (*bslmm*<sup>53</sup>) to identify single-gene effects. Given we do not know the genetic basis of molting  
244 phenotypes, the adaptive *bslmm* model allows us to infer it from the data. *Bslmm* combines both  
245 the linear mixed models (*lmm*<sup>31</sup>) and Bayesian variable regression models (*bsvr*<sup>54</sup>), giving the  
246 benefits of each when the underlying genetic basis of the trait (*i.e.* many genes of small effect vs.  
247 few genes of large effect) is unknown<sup>53</sup>. To statistically control for population structure in  
248 GEMMA<sup>55</sup>, we incorporated a genetic kinship matrix generated using 41,734 analyzed variants,  
249 where missing genotypes were imputed using *beagle*<sup>56</sup>. We then ran the *bslmm* model with the  
250 kinship matrix, sampling for 5 million generations and a burn-in period of 500,000 iterations.  
251 Candidate molt-migration associated SNPs were retained when they had a posterior inclusion  
252 probability (PIP) threshold  $> 0.1$ <sup>57</sup>. Second, we employed a multi-locus GWAS method,  
253 FASTmrMLM in the program mrMLM<sup>58</sup>, which is designed to detect multiple loci while  
254 reducing the chance of false positives. We implemented FASTmrMLM in the program mrMLM  
255 using the kinship matrix to account for population structure, and distance between loci to account  
256 for interaction among loci given a certain distance (default = 20kb, reported 100kb). To calculate  
257 distance between loci, we placed the scaffold positions in the Zebra Finch (*Taeniopygia guttata*)

258 chromosomal order using satsuma2 synteny<sup>59</sup> prior to the analyses. Candidate molt-migration  
259 associated SNPs were those that were found to have a LOD score > 3. To identify genes located  
260 near outlier SNPs generated using both single-locus and multi-locus methods, we downloaded  
261 Ensembl gene predictions for medium ground finch (GeoFor\_1.0, annotation version 102). We  
262 used *bedtools* -closest to find the gene closest to the candidate variants detected<sup>60</sup>. We then  
263 retained only genes which occurred within a 50kb of the candidate loci.

264

### 265 ***Gene-environment correlation analysis (GEA)***

266 To identify the environmental variables that best explained genetic variation underlying the  
267 molting phenotype we used gradient forest analysis with the R package *gradientForest*<sup>61</sup>.  
268 Climate and environmental data consisted of 19 WorldClim<sup>62</sup> variables, as well as vegetation  
269 indices (NDVI and NDVIstd, Carroll et al. 2004; Tree Cover, Sexton et al. 2013), elevation data  
270 (<http://www.landcover.org>), and a measure of surface moisture characteristics (QuickSCAT from  
271 <http://scp.byu.edu>). The genetic data consisted of allele frequencies from the 412 candidate loci  
272 with non-zero effects identified via our single-locus GWAS analysis. To provide a ranked  
273 environmental variable list based on the relative predictive power of all environmental variables,  
274 we ran *gradientForest* over 100 trees without binning the data due to the small number of  
275 candidate loci. To visualize the predicted associations between genetic variation between genetic  
276 variation in molt-linked loci and environmental variation across space we used the resulting  
277 gradient forest model to predict the association between environmental variables at 100,000  
278 random points across the Painted Bunting breeding range and plotted the relationships using  
279 principal components analysis (PCA). To visualize the different adaptive environments across  
280 the breeding range, we assigned colors to the breeding range based on the top three principal

281 components axes<sup>61</sup>. To determine whether our results were significantly different from random,  
282 we compared our observed results with those obtained from gradient forests run by randomizing  
283 the match between allele frequencies and the environmental data (n = 1000).

284 To further test the relationship between allele frequencies at the top ranked candidate  
285 genes identified in the GWAS above and the three highest ranking environmental variables  
286 identified by the gradient forest analysis, we used Pearson correlation (FDR corrected p-value  
287 <0.05).

288

### 289 ***Validating gene-environment relationships in key candidate loci***

290 To validate the association between allele frequencies in molt-linked loci and environmental  
291 variation, we created custom assays to genotype 261 new genetic samples from 25 breeding  
292 populations (12 new sites and 13 that overlapped with the RAD-seq analysis) at the top 6  
293 candidate genes with the highest association. We used the R package *snps2assays*<sup>63</sup> to create  
294 designable primers (e.g., GC content was less than 0.65, no insertions or deletions (indels) within  
295 30bp, and no additional variants within 20bp of the targeted variable site). Additionally, we  
296 aligned 25 bp surrounding the targeted variable sites to the genome using *bwa*<sup>64</sup> to confirm the  
297 primers mapped uniquely to the reference genome. Only the assay targeting *GLI2*, the top ranked  
298 candidate loci, passed all filters, and was subsequently genotyped on a Fluidigm™ 96.96 IFC  
299 controller. Allele frequencies were calculated for each location after removing individuals with  
300 greater than 20% missing data. Standard linear regression was used to test for associations  
301 between environmental variation at the top three climate variables and allele frequencies at *GLI2*  
302 in both the original (RAD-seq) and validation (SNP-only) datasets (FDR corrected p-value  
303 <0.05).

304 **RESULTS**

305 *Population genetic structure*

306 Overall, analysis of 41,786 total variants identified via RAD-sequencing revealed significant  
307 levels of population structure across the Painted bunting breeding range (Fig 1A-B). The PCA  
308 plot shows four distinct genetic clusters: an Eastern cluster (North Carolina), a Southwest cluster  
309 (Big Bend, TX), a Central-Southeastern cluster (Louisiana), and a Central cluster (including  
310 populations from western Oklahoma to Arkansas; Figure 1C). PC1 explains most of the variance  
311 (6.36%), separating the eastern genetic cluster from the larger continuous breeding range in the  
312 west, while PC2, which explains 2.22% of the variance and separates the southwest cluster (red;  
313 Big Bend, TX) from the central and south-central clusters. The admixture analyses support weak  
314 population structure between central, southwestern, central-southeastern, and eastern  
315 populations, but this may in part result from a lack of sampling at intermediate sites, particularly  
316 between sites in the Southwestern and Central regions. While overall genetic breaks within the  
317 breeding individuals were not concordant with hypothesized transitions in molting behavior, the  
318 population structure results can be incorporated into the subsequent GWAS analyses to reduce  
319 false positives related to population-specific genetic differences.

320

321 *Stable isotope assignment of molting phenotype*

322 The analysis of hydrogen stable isotope values from feathers ( $\delta^2\text{H}_f$ ) showed high variation  
323 ranging from -92.9‰ to -10.8‰. The differential index of hydrogen stable isotope values  
324 ( $\delta^2\text{H}_{\text{diff}}$ ) revealed limited variation at the extreme western (e.g., southwestern Texas) and eastern  
325 (e.g., Louisiana, Mississippi, and North Carolina) sampling sites of the breeding range and a  
326 larger gradient of values moving from the interior western population (e.g., Oklahoma) towards

327 southeastern U.S. (Fig 2 panel A–C; Table 1). Even though the resolution of our stable isotope  
328 analysis is coarse, it is nevertheless indicative of a transition around a  $-93^{\circ}.5'$  longitudinal  
329 meridian, from molt-migrants in the central portion of the western population to individuals that  
330 molt at or near their breeding grounds in the east, which is in agreement with previous work  
331 based on field observations and tracking data<sup>33</sup>.

332

### 333 ***Genes associated with the molting phenotype***

334 Both single gene (*bslmm*) and multi-locus (*mrMLM*) GWAS algorithms were used to find  
335 regions of the genome associated with molting, while accounting for population structure. In the  
336 *bslmm* analysis, a median of 91.1% of phenotypic variation was explained by the genotype (95%  
337 CI 45.2–99.9%), of which 46.7% was explained by SNPs with nonzero effects, but the credible  
338 intervals on this estimate were very high (95% CI 2.3–94.4%). Approximately 0.16% of the  
339 variants had non-zero effects ( $n = 412$ ), however 67 were considered to have major effects. We  
340 defined the top candidate SNPs as those that were found with sparse effects in at least 10% of the  
341 MCMC runs ( $PIP > 0.1$ ), after controlling for population structure (Fig. 3A). Of these outlier  
342 SNPs, the top two were also identified in the *mrMLM* analysis (Table 2 and Table 3). The  
343 strongest single-gene effect was found for a SNP on chromosome 7, within the coding region of  
344 the *GLI2* gene. The next two strongest associations were identified on chromosome 4A, situated  
345 within the coding region of an uncharacterized protein (LOC102037655), and on chromosome 2,  
346 located in the regulatory region approximately 15 kbp downstream from the *HEPACAM2* gene.  
347 The multi-locus approach identified 5 additional genes associated with the molt-migration  
348 strategy (Fig 3). Similar to the *bslmm* analysis, the highest effect identified in the multi-locus  
349 analysis points to a variant in the *GLI2* gene. The remaining genes identified with high effect

350 sizes were *CSPG4*, *PDGF-B*, *CNOT9*, *ARHGAP26*, and two uncharacterized proteins  
351 (LOC102037655 and LOC102037327).

352

### 353 ***Environmental variables associated with molting***

354 While previous work used gradient forest to rank which environmental variables are most  
355 important to describing patterns of genetic variation across space<sup>65,66</sup>, here we use gradient forest  
356 to identify environmental variables associated specifically with loci underlying molting. This  
357 novel use of gradient forest allows us to focus on putative environmental drivers of local  
358 adaptation in a specific phenotype known to have important fitness effects. Overall, our GEA  
359 analysis found a strong relationship between environmental variables and genomic variation  
360 underlying molting phenotypes (i.e., the 412 variants identified in the *bslmm* analysis that had  
361 non-zero effects). In particular, bioclimatic variables did best at explaining genomic variation,  
362 with nine of the 10 most important predictors in our model representing either temperature or  
363 precipitation measurements (Fig S1-A). The top four explanatory variables in our model were  
364 BIO-15, BIO-01, NDVIstd, and BIO-13, which are precipitation seasonality, annual mean  
365 temperature, standard deviation of normalized difference vegetation index, and precipitation of  
366 the wettest month, respectively (Fig S1-B). The vegetation index, related to seasonal variance in  
367 plant green biomass accumulation, can be used to monitor the productivity cycle by  
368 characterizing the response change in patterns of vegetation cover. Spatial visualization of these  
369 variables indicated that the climate transitions to more precipitation during the wettest month  
370 with greater seasonal variation in precipitation and less variation in productivity moving from  
371 west to east along the sampling transect (Fig. S2). In addition, the central-southeastern  
372 populations were characterized by high annual mean temperatures and low variance in



373 precipitation across the season (Fig S1-C). Further, randomization permutations demonstrated  
374 that these results were significantly different from random ( $p < 0.05$ , Fig S1-D).

375 Targeted genotyping using Fluidigm assays of the top-ranking gene, *GLI2* (Fig 3-A),  
376 associated with molting phenotypes in an additional 261 birds at 25 locations (12 new and 13  
377 that overlap with the RAD-seq dataset) independently validated the association of *GLI2* and  
378 annual mean temperature (FDR-corrected  $P < 0.05$ ; Fig 3-B,C). The highest allele frequencies at  
379 this SNP occurred in the southern and eastern most portion of the Painted Bunting range (Texas  
380 and the eastern cluster, Fig 3-B), areas of higher temperature, where migrants are thought to molt  
381 on the breeding ground, prior to migration to wintering grounds. The greatest variation in *GLI2*,  
382 is in the hypothesized transition zone of molting phenotypes (central Oklahoma and Arkansas).

383

384

385

386

387

388

389

390

391

392

393

394

395

## 396 **DISCUSSION**

397 The timing and location of molting behavior has important fitness consequences for migratory  
398 animals. In particular, migratory birds must optimize access to food resources to survive high  
399 energetic costs associated with molting<sup>67,68</sup>. In addition, because feather molting leaves birds  
400 without a protective layer to buffer them from temperature extremes, there are likely strong  
401 selective pressures on choosing molting locations with minimal temperature fluctuations<sup>69</sup>. Here,  
402 we integrate isotopic and genome-wide genetic analyses to assess factors regulating the  
403 maintenance of variation in molting strategies in the iconic migratory songbird, the Painted  
404 Bunting. We found that the transition from molt-migrants in the west to migrants that molt on  
405 their breeding grounds further east is not coincident with a strong barrier to gene flow, running  
406 counter to hypotheses about the role of differences in the timing and location of molting in the  
407 early stages of divergence<sup>21,70,71</sup>. However, GWAS analysis identified several candidate genes  
408 associated with distinct molting phenotypes that are also known to be involved in feather  
409 morphogenesis and feather structure, providing the first window into the potential genetic basis  
410 of this key fitness-linked trait. Further, GEA analysis found that allele frequencies in loci linked  
411 to molt-migratory behavior are associated with environmental variables linked to precipitation,  
412 seasonality and aridity, in keeping with the push-pull hypothesis<sup>36,72,73</sup>. Overall, the results  
413 support the idea that locally adapted molting phenotypes have evolved in migratory birds as a  
414 means of facilitating life in seasonal environments.

415 A key question in evolutionary ecology is to determine whether a particular phenotypic  
416 trait leads to population genetic differentiation and ultimately speciation. Some authors have  
417 proposed that differences in the timing of molt between populations could lead to reduced gene  
418 flow across migratory divides if hybrids with intermediate molting behavior are less fit<sup>74-76</sup>, but

419 empirical support for this idea has been limited<sup>22</sup>. Here, we investigated whether variation in  
420 hydrogen stable isotope values in Painted Bunting feathers is associated with reduced gene flow  
421 across a transect between populations with differences in the molting behavior. To address this  
422 question, we used an innovative approach that combined genomics and stable isotope analysis to  
423 reveal that the variation of the molt-migratory phenotype is not coincident with a barrier to gene  
424 flow in the Painted Bunting. Importantly, our genome-wide approach was generally in agreement  
425 with previous genetic studies, identifying four distinct genetic clusters across its breeding range,  
426 including an eastern, central, southwestern, and central southeastern population<sup>77,78</sup> (Fig 1). By  
427 contrast, stable isotope analysis was in keeping with field observations and geolocator studies  
428 suggesting a shift in molting phenotypes within the central genetic group, from molt-migrants in  
429 the west to individuals in the east that molt on the breeding grounds prior to migration.

430       Specifically, individuals breeding in the central part of the western range exhibited larger  
431 variation in hydrogen stable isotope differential index ( $\delta^2\text{H}_{\text{diff}}$ ), suggesting that western birds  
432 experience a broader range of environmental conditions, possibly linked to moving to molting  
433 locations after breeding (e.g., molt-migrants). By contrast, eastern birds and Texas birds at the  
434 very edge of the western breeding distribution exhibited smaller  $\delta^2\text{H}_{\text{diff}}$  values, consistent with  
435 individuals molting in the same environments where they breed. While it is perhaps  
436 counterintuitive that molt-migrants of central part of the western range leave the breeding  
437 grounds to molt in more water-stressed regions, such as northwestern Mexico as previously  
438 demonstrated<sup>23,24,34</sup>, it is in keeping with the idea that they are at these sites to take advantage of  
439 the monsoon period when productivity is at its peak<sup>73,79</sup>. Thus, while overall we did not detect a  
440 barrier to gene flow coincident with a transition in molting strategies, the ability to identify

441 molting phenotypes using stable isotope analysis opens opportunities for understanding the  
442 genetic and ecological factors underlying this important fitness-linked trait<sup>80</sup>.

443 Little is known about the genetic basis of molting behavior despite its potentially  
444 important consequences to fitness in migratory birds<sup>81,82</sup>. While previous genetic research has  
445 identified candidate genes linked to the speed of tail feather molt in the long-distance migratory  
446 Willow Warbler<sup>83</sup>, no study to date has investigated the genetic basis of molt-migratory behavior  
447 in natural populations. Here we use GWAS to identify significant associations between genetic  
448 variation and the molt-migratory phenotype and find the strongest association with a SNP  
449 located within an intronic region on the *GLI2* gene. *GLI2* is a clear candidate for involvement in  
450 feather molt, as studies have shown it is a transcription regulator of the Sonic Hedgehog (Shh)  
451 signaling pathway that specifies positional information required for the formation of adult flight  
452 feathers<sup>84</sup>. Moreover, *GLI2* activates and is co-expressed with Follistatin<sup>85</sup>, a gene that is linked  
453 to the development of hair follicles in mammals and feathers in birds as demonstrated by gene  
454 knockout experiments in *Mus musculus*<sup>86</sup> and ectopic induction of feather growth in *Gallus*  
455 *gallus*<sup>87,88</sup>. In addition to *GLI2*, our association analyses identified a second gene, *CSPG4*, which  
456 has a demonstrated role in feather structure<sup>89</sup>. Specifically, manipulative experiments designed to  
457 reduce expression of *CSPGs* resulted in significantly thinner feathers<sup>89</sup>. While *GLI2* and *CSPG4*  
458 are both good candidates for playing a role in molting, further work is needed to clarify the role  
459 of these genes in the molting process. In addition, whole genome resequencing may help identify  
460 additional loci which contribute to the genetic basis of what is very likely a highly polygenic  
461 trait.

462 Here we take a landscape genomic approach to identify the putative environmental  
463 drivers of genetic differentiation at molt-associated loci and, in keeping with the push-pull

464 hypothesis, we find a higher proportion of molt-migrant associated genotypes in regions  
465 characterized by higher seasonality and more extreme summer temperatures. Specifically, our  
466 GEA analysis supports the idea that the top environmental predictors of molt-associated loci  
467 include seasonality, productivity and aridity variables (BIO-15, BIO-13, and BIO-1; Fig S2). In  
468 particular, arid and low productivity environments in OK and TX are highly correlated with  
469 molt-migration linked genotypes, while higher productivity, wetter regions are associated with  
470 genotypes linked to breeding ground molting. In keeping with the push-pull hypothesis, these  
471 results support the idea that the hot and dry climates in northwestern breeding areas may place  
472 selective pressure on Painted Buntings to migrate south to molt in wetter, more productive  
473 monsoon regions of Northern Mexico (pull). Given that an estimated 52% of migratory birds  
474 breeding in this region exhibit molt-migratory behavior<sup>36,90</sup>, future work focusing comparisons  
475 between the results described herein and other molt-migrants may help clarify the generality of  
476 these findings.

477         Looking more in depth at the top candidate genes identified within our GWAS analysis,  
478 we see significant correlations between allele frequency in genes linked to molting and putative  
479 ecological drivers related to precipitation and aridity (Fig 3-B,C; Fig S2). Specifically, allele  
480 frequency in *GLI2*, our top-ranking candidate gene known to be involved in feather  
481 morphogenesis, is significantly associated with annual mean temperature. High frequency in this  
482 allele generally occurs in regions where late summer temperatures are more extreme, while low  
483 frequency occurs where late summer temperatures are less extreme (Fig 3-B, C). While false  
484 positives are a common pitfall of many GEA-based analyses<sup>91-93</sup>, here we are able to validate the  
485 association between allele frequency in *GLI2* and late summer temperatures by genotyping an  
486 additional 261 individuals from 25 locations and find that the significant association holds true in

487 both the original and validation datasets. While further work is needed to understand the specific  
488 role of *GLI2* in feather production in Painted Buntings, our results suggest that molt-migratory  
489 individuals may be genetically distinct from traditional migrants at this gene and that such  
490 variation is driven by differences in summer temperatures.

491 In addition to *GLI2*, allele frequency in our second ranking gene, *CSPG4*, a gene known  
492 to be involved in feather structure, was significantly associated with precipitation seasonality and  
493 to a lesser extent annual mean temperature. High frequency of this gene is found in regions  
494 characterized by greater extremes between wet and dry seasons, while low frequency of this gene  
495 is found in parts of the range characterized by more consistent precipitation patterns year-round  
496 (Fig S2). Considering this gene's known role in feather structure<sup>89</sup>, it is possible that the  
497 environmental conditions which are pushing migrants to molt in Mexico simultaneously result in  
498 differential selection on feather structure relative to populations which molt on their breeding  
499 grounds. Unfortunately, we were unable to successfully design SNP-type assays that could be  
500 used to test if these associations, or any of the other associations with productivity and  
501 precipitation found in our top-ranking genes (Fig S2) remained significant when additional  
502 sampling locations were added to the data set. Future research including functional  
503 characterization of these genes and other novel candidate genes would help further clarify  
504 genotype-phenotype and environmental links<sup>94</sup>.

505

506

507

508

509

## 510 **CONCLUSIONS**

511 Here we combine genome-wide genetic and isotopic analysis to identify putative genetic and  
512 environmental drivers of variation in molting strategy in the Painted Bunting. Counter to existing  
513 hypotheses on the potential role of differences in molting behavior in the fitness of hybrid  
514 offspring, we find no support for the idea that the transition in molt-migratory behavior is  
515 significantly correlated with a barrier to gene flow. Alternatively, the results of our GWAS  
516 support the hypothesis that differences between molt-migrants and traditional migrants in  
517 molting behavior is in part controlled by genes involved in feather morphogenesis and feather  
518 structure. Further, our GEA results suggest that genetic variation in these genes is driven at least  
519 in part by differences in aridity and precipitation patterns in keeping with the push-pull  
520 hypothesis. Overall, this work strongly supports the idea that molt-migratory behavior is a  
521 locally adapted trait that has evolved to help migratory birds cope with life in highly seasonal  
522 environments.

523

524

## 525 ***Acknowledgments***

526 This work was made possible by a California Energy Commission grant to K. Ruegg, a National  
527 Geographic grant to K. Ruegg (WW-202R-17), and a grant to K. Ruegg from the National  
528 Science Foundation (NSF-1942313). Postdoctoral work conducted by A. Contina was supported  
529 in part by Jeff Kelly (NSF award 1840230). We thank the DNA Technologies and Expression  
530 Analysis Cores at the UC Davis Genome Center (supported by NIH Shared Instrumentation  
531 Grant 1S10OD010786-01) for their assistance with the Next-Generation Sequencing.  
532 Computational allocations from the Extreme Science and Engineering Discovery Environment

533 (Xsede), as well as UCLA's Shared Hoffman2 Cluster made this work possible. We thank  
534 Thomas B. Smith, the Department of Ecology and Evolutionary Biology, and the Center for  
535 Tropical Research at the University of California, Los Angeles, for providing laboratory and  
536 sample collection support. We also thank Eli Bridge, Tyler Michels, William Oakley, Heather  
537 LePage, Elizabeth Besozzi, John Muller, Jeff Johnson and Matt Poole for their assistance with  
538 sample collection. We credit the Painted Bunting artwork used in Figure 1 to The Cornell Lab of  
539 Ornithology, Cornell University, available at <https://birdsoftheworld.org>.

540

541

542

543

544

545

546

547

548

549

550

551

552

553

554

555



556 **References**

557

- 558 1. Stefansson, S. O., Björnsson, B. T., Ebbesson, L. O. E. & McCormick, S. D.  
559 Smoltification. in *Fish larval physiology* 639–681 (CRC Press, 2020).
- 560 2. Kaleka, A. S., Kaur, N. & Bali, G. K. Larval Development and Molting. in *Edible Insects*  
561 17 (IntechOpen, 2019).
- 562 3. Butler, L. K. & Rohwer, V. G. Feathers and molt. *Ornithol. Found. Anal. Appl.* 242–270  
563 (2018).
- 564 4. Swaddle, J. P., Witter, M. S., Cuthill, I. C., Budden, A. & McCowen, P. Plumage  
565 condition affects flight performance in common starlings: implications for developmental  
566 homeostasis, abrasion and moult. *J. Avian Biol.* 103–111 (1996).
- 567 5. Norris, D. R., Marra, P. P., Montgomerie, R., Kyser, T. K. & Ratcliffe, L. M.  
568 Reproductive effort, molting latitude, and feather color in a migratory songbird. *Science*  
569 **306**, 2249–2250 (2004).
- 570 6. Delhey, K., Peters, A. & Kempenaers, B. Cosmetic coloration in birds: occurrence,  
571 function, and evolution. *Am. Nat.* **169**, S145-S158 (2007).
- 572 7. Tomotani, B. M. & Muijres, F. T. A songbird compensates for wing molt during escape  
573 flights by reducing the molt gap and increasing angle of attack. *J. Exp. Biol.* **222**,  
574 jeb195396 (2019).
- 575 8. Speakman, J. R. & Król, E. Maximal heat dissipation capacity and hyperthermia risk:  
576 neglected key factors in the ecology of endotherms. *J. Anim. Ecol.* **79**, 726–746 (2010).
- 577 9. Wolf, B. O. & Walsberg, G. E. The role of the plumage in heat transfer processes of birds.  
578 *Am. Zool.* **40**, 575–584 (2000).

- 579 10. Berthold, P. & Querner, U. Genetic basis of moult, wing length, and body weight in a  
580 migratory bird species, *Sylvia atricapilla*. *Experientia* **38**, 801–802 (1982).
- 581 11. Gwinner, E., Neusser, V., Engl, D., Schmidl, D. & Bals, L. Haltung, Zucht und Eiaufzucht  
582 afrikanischer und europäischer Schwarzkehlchen *Saxicola torquata*. *Gefied. Welt* **111**,  
583 118–120 (1987).
- 584 12. Berthold, P. & Querner, U. Microevolutionary aspects of bird migration based on  
585 experimental results. *Isr. J. Ecol. Evol.* **41**, 377–385 (1995).
- 586 13. Tonra, C. M. & Reudink, M. W. Expanding the traditional definition of molt-migration.  
587 *Auk Ornithol. Adv.* **135**, 1123–1132 (2018).
- 588 14. Rohwer, S., Butler, L. K., Froehlich, D. R., Greenberg, R. & Marra, P. P. Ecology and  
589 demography of east–west differences in molt scheduling of Neotropical migrant  
590 passerines. *Birds Two Worlds Ecol. Evol. Migr. (R. Greenb. PP Marra, Eds.). Johns*  
591 *Hopkins Univ. Press. Balt. Maryl.* 87–105 (2005).
- 592 15. Bensch, S., Åkesson, S. & Irwin, D. E. The use of AFLP to find an informative SNP:  
593 genetic differences across a migratory divide in willow warblers. *Mol. Ecol.* **11**, 2359–  
594 2366 (2002).
- 595 16. Ruegg, K. Genetic, morphological, and ecological characterization of a hybrid zone that  
596 spans a migratory divide. *Evol. Int. J. Org. Evol.* **62**, 452–466 (2008).
- 597 17. Delmore, K. E., Fox, J. W. & Irwin, D. E. Dramatic intraspecific differences in migratory  
598 routes, stopover sites and wintering areas, revealed using light-level geolocators. *Proc. R.*  
599 *Soc. B Biol. Sci.* **279**, 4582–4589 (2012).
- 600 18. Delmore, K. E. *et al.* Individual variability and versatility in an eco-evolutionary model of  
601 avian migration. *Proc. R. Soc. B* **287**, 20201339 (2020).

- 602 19. Procházka, P. *et al.* Across a migratory divide: divergent migration directions and non-  
603 breeding grounds of Eurasian reed warblers revealed by geolocators and stable isotopes. *J.*  
604 *Avian Biol.* **49**, jav-012516 (2018).
- 605 20. Bensch, S., Grahm, M., Müller, N., Gay, L. & Åkesson, S. Genetic, morphological, and  
606 feather isotope variation of migratory willow warblers show gradual divergence in a ring.  
607 *Mol. Ecol.* **18**, 3087–3096 (2009).
- 608 21. Rohwer, S. & Irwin, D. E. Molt, orientation, and avian speciation. *Auk* **128**, 419–425  
609 (2011).
- 610 22. Pageau, C., Sonnleitner, J., Tonra, C. M., Shaikh, M. & Reudink, M. W. Evolution of  
611 winter molting strategies in European and North American migratory passerines. *Ecol.*  
612 *Evol.* **11**, 13247–13258 (2021).
- 613 23. Butler, L. K., Rohwer, S. & Rogers, M. Prebasic molt and molt-related movements in  
614 Ash-throated Flycatchers. *Condor* **108**, 647–660 (2006).
- 615 24. Barry, J. H., Butler, L. K., Rohwer, S. & Rohwer, V. G. Documenting molt-migration in  
616 Western Kingbird (*Tyrannus verticalis*) using two measures of collecting effort. *Auk* **126**,  
617 260–267 (2009).
- 618 25. Hobson, K. A. & Wassenaar, L. I. Linking breeding and wintering grounds of neotropical  
619 migrant songbirds using stable hydrogen isotopic analysis of feathers. *Oecologia* **109**,  
620 142–148 (1996).
- 621 26. Hobson, K. A. & Wassenaar, L. I. *Tracking animal migration with stable isotopes.*  
622 (Academic Press, 2018).
- 623 27. Rubenstein, D. R. & Hobson, K. A. From birds to butterflies: animal movement patterns  
624 and stable isotopes. *Trends Ecol. & Evol.* **19**, 256–263 (2004).

- 625 28. Bearhop, S. *et al.* Assortative mating as a mechanism for rapid evolution of a migratory  
626 divide. *Science* **310**, 502–504 (2005).
- 627 29. Eppig, J. T. *et al.* The Mouse Genome Database (MGD): comprehensive resource for  
628 genetics and genomics of the laboratory mouse. *Nucleic Acids Res.* **40**, 881-886 (2012).
- 629 30. Contina, A., Bridge, E. S. & Kelly, J. F. Exploring novel candidate genes from the Mouse  
630 Genome Informatics database: Potential implications for avian migration research. *Integr.*  
631 *Zool.* **11**(4), 240-249 (2016).
- 632 31. Yang, J. *et al.* Common SNPs explain a large proportion of the heritability for human  
633 height. *Nat. Genet.* **42**, 565–569 (2010).
- 634 32. Thompson, C. W. Is the Painted Bunting actually two species? Problems determining  
635 species limits between allopatric populations. *Condor* **93**, 987–1000 (1991).
- 636 33. Contina, A., Bridge, E. S., Seavy, N. E., Duckles, J. M. & Kelly, J. F. Using geologgers to  
637 investigate bimodal isotope patterns in Painted Buntings (*Passerina ciris*). *Auk* **130**(2),  
638 265-272 (2013).
- 639 34. Besozzi, E., Chew, B., Allen, D. C. & Contina, A. Stable isotope analysis of an aberrant  
640 Painted Bunting (*Passerina ciris*) feather suggests post-molt movements. *Wilson J.*  
641 *Ornithol.* **133**(1), 151-158 (2021).
- 642 35. Sharp, A. *et al.* Spatial and temporal scale-dependence of the strength of migratory  
643 connectivity in a North American passerine. ResearchSquare pre-print  
644 <https://doi.org/10.21203/rs.3.rs-1483049/v1> (2022).
- 645 36. Pyle, P. *et al.* Temporal, spatial, and annual variation in the occurrence of molt-migrant  
646 passerines in the Mexican monsoon region. *Condor* **111**, 583–590 (2009).
- 647 37. Bridge, E. S., Fudickar, A. M., Kelly, J. F., Contina, A. & Rohwer, S. Causes of bimodal

- 648 stable isotope signatures in the feathers of a molt-migrant songbird. *Can. J. Zool.* **89**(10),  
649 951-959 (2011).
- 650 38. Seutin, G., White, B. N. & Boag, P. T. Preservation of avian blood and tissue samples for  
651 DNA analyses. *Can. J. Zool.* **69**, 82–90 (1991).
- 652 39. Ali, O. A. *et al.* RAD capture (Rapture): Flexible and efficient sequence-based  
653 genotyping. *Genetics* **202**, 389–400 (2016).
- 654 40. Contina, A. *et al.* Characterization of SNP markers for the painted bunting (*Passerina*  
655 *ciris*) and their relevance in population differentiation and genome evolution studies.  
656 *Conserv. Genet. Resour.* **11**, 5–10 (2019).
- 657 41. Catchen, J., Hohenlohe, P. A., Bassham, S., Amores, A. & Cresko, W. A. Stacks: an  
658 analysis tool set for population genomics. *Mol. Ecol.* **22**, 3124–3140 (2013).
- 659 42. Parker, P., Li, B., Li, H. & Wang, J. The genome of Darwin's Finch (*Geospiza fortis*).  
660 *Gigascience* **10**, 100040 (2012).
- 661 43. Langmead, B. & Salzberg, S. L. Fast gapped-read alignment with Bowtie 2. *Nat. Methods*  
662 **9**, 357–359 (2012).
- 663 44. Auwera, G. A. Van der *et al.* From FastQ data to high-confidence variant calls: the  
664 genome analysis toolkit best practices pipeline. *Curr. Protoc. Bioinforma.* **43**(1), 11-10  
665 (2013).
- 666 45. McKenna, A. *et al.* The Genome Analysis Toolkit: a MapReduce framework for analyzing  
667 next-generation DNA sequencing data. *Genome Res.* **20**, 1297–1303 (2010).
- 668 46. Danecek, P. *et al.* The variant call format and VCFtools. *Bioinformatics* **27**, 2156–2158  
669 (2011).
- 670 47. Anderson, E. *genoscapeRtools*: tools for building migratory bird genoscapes. (2019).

- 671 48. Alexander, D. H., Novembre, J. & Lange, K. Fast model-based estimation of ancestry in  
672 unrelated individuals. *Genome Res.* **19**, 1655–1664 (2009).
- 673 49. Alexander, D. H. & Lange, K. Enhancements to the ADMIXTURE algorithm for  
674 individual ancestry estimation. *BMC Bioinformatics* **12**, 246 (2011).
- 675 50. Francis, R. M. pophelper: an R package and web app to analyse and visualize population  
676 structure. *Mol. Ecol. Resour.* **17**, 27–32 (2017).
- 677 51. Bowen, G. J., Wassenaar, L. I. & Hobson, K. A. Global application of stable hydrogen  
678 and oxygen isotopes to wildlife forensics. *Oecologia* **143**, 337–348 (2005).
- 679 52. Wassenaar, L. I. & Hobson, K. A. Stable-hydrogen isotope heterogeneity in keratinous  
680 materials: mass spectrometry and migratory wildlife tissue subsampling strategies. *Rapid*  
681 *Commun. Mass Spectrom. An Int. J. Devoted to Rapid Dissem. Up-to-the-Minute Res.*  
682 *Mass Spectrom.* **20**, 2505–2510 (2006).
- 683 53. Zhou, X., Carbonetto, P. & Stephens, M. Polygenic modeling with Bayesian sparse linear  
684 mixed models. *PLoS Genet.* **9**, e1003264 (2013).
- 685 54. Guan, Y. & Stephens, M. Bayesian variable selection regression for genome-wide  
686 association studies and other large-scale problems. *Ann. Appl. Stat.* **5**, (2011).
- 687 55. Marchini, J., Cardon, L. R., Phillips, M. S. & Donnelly, P. The effects of human  
688 population structure on large genetic association studies. *Nat. Genet.* **36**, 512–517 (2004).
- 689 56. Browning, S. R. & Browning, B. L. Rapid and accurate haplotype phasing and missing-  
690 data inference for whole-genome association studies by use of localized haplotype  
691 clustering. *Am. J. Hum. Genet.* **81**, 1084–1097 (2007).
- 692 57. Chaves, J. A. *et al.* Genomic variation at the tips of the adaptive radiation of Darwin’s  
693 finches. *Mol. Ecol.* **25**, 5282–5295 (2016).

- 694 58. Zhang, Y.-W. *et al.* mrMLM v4.0.2: an R Platform for multi-locus genome-wide  
695 association studies. *Genomics, Proteomics & Bioinforma.* **18**, 481–487 (2020).
- 696 59. Grabherr, M. G. *et al.* Genome-wide synteny through highly sensitive sequence  
697 alignment: Satsuma. *Bioinformatics* **26**, 1145–1151 (2010).
- 698 60. Quinlan, A. R. & Hall, I. M. BEDTools: a flexible suite of utilities for comparing genomic  
699 features. *Bioinformatics* **26**, 841–842 (2010).
- 700 61. Ellis, N., Smith, S. J. & Pitcher, C. R. Gradient forests: calculating importance gradients  
701 on physical predictors. *Ecology* **93**, 156–168 (2012).
- 702 62. Hijmans, R. J., Cameron, S. E., Parra, J. L., Jones, P. G. & Jarvis, A. Very high resolution  
703 interpolated climate surfaces for global land areas. *Int. J. Climatol.* **25**, 1965–1978 (2005).
- 704 63. Anderson, E. C. snps2assays: prepare SNP assay orders from ddRAD or RAD loci.  
705 (2015).
- 706 64. Li, H. & Durbin, R. Fast and accurate short read alignment with Burrows-Wheeler  
707 transform. *Bioinformatics* **25**, 1754–1760 (2009).
- 708 65. Ruegg, K. *et al.* Ecological genomics predicts climate vulnerability in an endangered  
709 southwestern songbird. *Ecol. Lett.* **21**, 1085–1096 (2018).
- 710 66. Bay, R. A. *et al.* Genomic signals of selection predict climate-driven population declines  
711 in a migratory bird. *Science* **359**, 83–86 (2018).
- 712 67. Hedenström, A. Adaptations to migration in birds: behavioural strategies, morphology and  
713 scaling effects. *Philos. Trans. R. Soc. B Biol. Sci.* **363**, 287–299 (2008).
- 714 68. Buehler, D. M. & Piersma, T. Travelling on a budget: predictions and ecological evidence  
715 for bottlenecks in the annual cycle of long-distance migrants. *Philos. Trans. R. Soc. B*  
716 *Biol. Sci.* **363**, 247–266 (2008).

- 717 69. Schieltz, P. C. & Murphy, M. E. The contribution of insulation changes to the energy cost  
718 of avian molt. *Can. J. Zool.* **75**, 396–400 (1997).
- 719 70. Carling, M. D. & Thomassen, H. A. The role of environmental heterogeneity in  
720 maintaining reproductive isolation between hybridizing Passerina (Aves: Cardinalidae)  
721 buntings. *Int. J. Ecol.* **2012**, (2012).
- 722 71. Irwin, D. E. Incipient ring speciation revealed by a migratory divide. *Mol. Ecol.* **18**, 2923–  
723 2925 (2009).
- 724 72. Thomas, D. W., Blondel, J., Perret, P., Lambrechts, M. M. & Speakman, J. R. Energetic  
725 and fitness costs of mismatching resource supply and demand in seasonally breeding  
726 birds. *Science* **291**, 2598–2600 (2001).
- 727 73. Rohwer, V. G., Rohwer, S. & Ortiz-Ramirez, M. F. Molt biology of resident and migrant  
728 birds of the monsoon region of west Mexico. *Ornitol. Neotrop.* **20**, 565–584 (2009).
- 729 74. Bensch, S., Andersson, T. & Åkesson, S. Morphological and molecular variation across a  
730 migratory divide in willow warblers, *Phylloscopus trochilus*. *Evolution* **53**, 1925–1935  
731 (1999).
- 732 75. Turbek, S. P., Scordato, E. S. C. & Safran, R. J. The role of seasonal migration in  
733 population divergence and reproductive isolation. *Trends Ecol. & Evol.* **33**, 164–175  
734 (2018).
- 735 76. Scordato, E. S. C. *et al.* Migratory divides coincide with reproductive barriers across  
736 replicated avian hybrid zones above the Tibetan Plateau. *Ecol. Lett.* **23**, 231–241 (2020).
- 737 77. Battey, C. J. *et al.* A migratory divide in the Painted Bunting (*Passerina ciris*). *Am. Nat.*  
738 **191**, 259–268 (2018).
- 739 78. Contina, A. *et al.* Genetic structure of the Painted Bunting and its implications for



- 740 conservation of migratory populations. *Ibis*, **161**(2),372-386 (2019).
- 741 79. Butler, L. K. The grass is always greener: Do monsoon rains matter for molt of the  
742 Vermilion Flycatcher (*Pyrocephalus rubinus*)? *Auk* **130**, 297–307 (2013).
- 743 80. Turbek, S. P. *et al.* A migratory divide spanning two continents is associated with  
744 genomic and ecological divergence. *Evolution* **76**(4),722-736 (2022).
- 745 81. Dietz, M. W., Daan, S. & Masman, D. Energy requirements for molt in the kestrel *Falco*  
746 *tinnunculus*. *Physiol. Zool.* **65**, 1217–1235 (1992).
- 747 82. Vézina, F., Gustowska, A., Jalvingh, K. M., Chastel, O. & Piersma, T. Hormonal  
748 correlates and thermoregulatory consequences of molting on metabolic rate in a northerly  
749 wintering shorebird. *Physiol. Biochem. Zool.* **82**, 129–142 (2009).
- 750 83. Bazzi, G. *et al.* Candidate genes have sex-specific effects on timing of spring migration  
751 and moult speed in a long-distance migratory bird. *Curr. Zool.* **63**, 479–486 (2017).
- 752 84. Busby, L. *et al.* Sonic hedgehog specifies flight feather positional information in avian  
753 wings. *Development* **147**, dev188821 (2020).
- 754 85. Eichberger, T. *et al.* GLI2-specific transcriptional activation of the bone morphogenetic  
755 protein Activin antagonist Follistatin in human epidermal cells. *J. Biol. Chem.* **283**,  
756 12426–12437 (2008).
- 757 86. Matzuk, M. M. *et al.* Multiple defects and perinatal death in mice deficient in follistatin.  
758 *Nature* **374**, 360–363 (1995).
- 759 87. Patel, K., Makarenkova, H. & Jung, H.-S. The role of long range, local and direct  
760 signalling molecules during chick feather bud development involving the BMPs,  
761 follistatin and the Eph receptor tyrosine kinase Eph-A4. *Mech. Dev.* **86**, 51–62 (1999).
- 762 88. Nakamura, M. *et al.* Control of pelage hair follicle development and cycling by complex

- 763 interactions between follistatin and activin. *FASEB J.* **17**, 1–22 (2003).
- 764 89. Pays, L., Charvet, I., Hemming, F. J. & Saxod, R. Close link between cutaneous nerve  
765 pattern development and feather morphogenesis demonstrated by experimental production  
766 of neo-apteria and ectopic feathers: implication of chondroitin sulphate proteoglycans and  
767 other matrix molecules. *Anat. Embryol. (Berl)*. **195**, 457–466 (1997).
- 768 90. Pyle, P., Saracco, J. F. & DeSante, D. F. Evidence of widespread movements from  
769 breeding to molting grounds by North American landbirds. *Auk Ornithol. Adv.* **135**, 506–  
770 520 (2018).
- 771 91. De Mita, S. *et al.* Detecting selection along environmental gradients: analysis of eight  
772 methods and their effectiveness for outbreeding and selfing populations. *Mol. Ecol.* **22**,  
773 1383–1399 (2013).
- 774 92. Lotterhos, K. E. & Whitlock, M. C. Evaluation of demographic history and neutral  
775 parameterization on the performance of FST outlier tests. *Mol. Ecol.* **23**, 2178–2192  
776 (2014).
- 777 93. Frichot, E., Schoville, S. D., de Villemereuil, P., Gaggiotti, O. E. & François, O. Detecting  
778 adaptive evolution based on association with ecological gradients: orientation matters!  
779 *Heredity (Edinb)*. **115**, 22–28 (2015).
- 780 94. Trivedi, A. K. *et al.* Temperature alters the hypothalamic transcription of photoperiod  
781 responsive genes in induction of seasonal response in migratory redheaded buntings. *Mol.*  
782 *Cell. Endocrinol.* **493**, 110454 (2019).

783

784

785

786 **FIGURES**

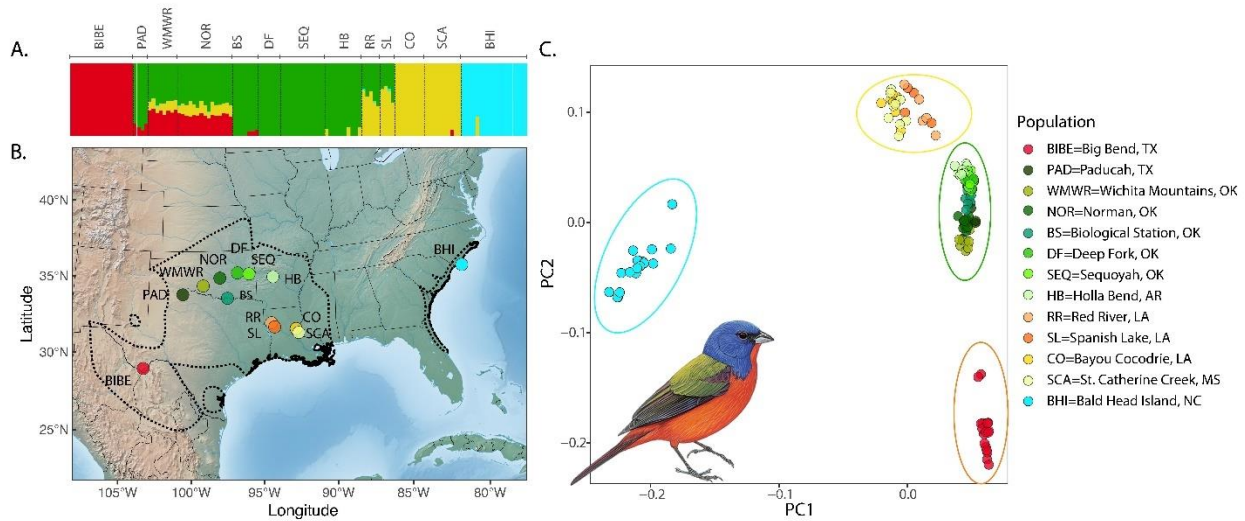

787  
788

789 **Figure 1.** The breeding range of Painted Buntings used for this study, and the genetic clustering  
790 of sampled individuals. A) The sampled individuals represent four distinct genetic clusters  
791 (Texas: red, Central: green, Louisiana: orange/yellow, and Coastal clusters: cyan). B) Breeding  
792 individuals were sampled from 13 locations spanning the entire breeding range of Painted  
793 Buntings (dotted line). C) PCA of genetic variation of 41,786 variants. Green dots correspond to  
794 the Central genetic cluster and our sampling transect across populations with differences in  
795 molting behavior.

796  
797  
798  
799  
800

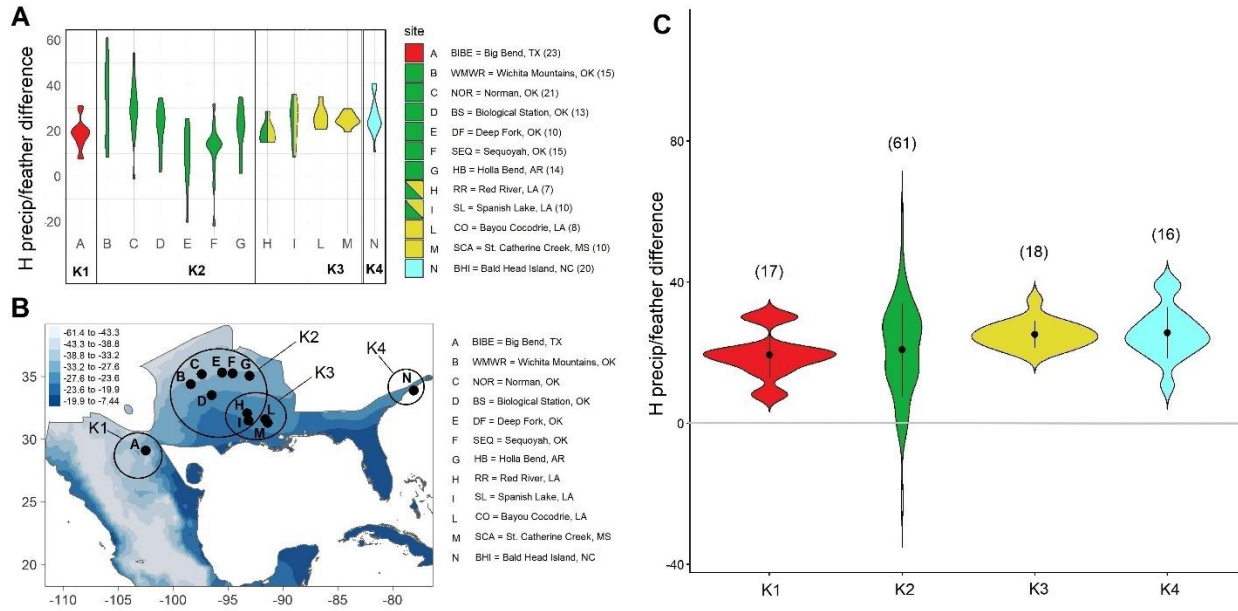

801  
802  
803  
804 **Figure 2.** The variation of hydrogen stable isotope values across the breeding range of the  
805 Painted Bunting. Different colors match the clusters of the genetic analysis presented in Fig 1.  
806 These genetic cluster (K1-4) correspond to an Eastern cluster (North Carolina; cyan), a  
807 Southwest cluster (Texas, red), a Central-Southeastern cluster (Louisiana, yellow), and a Central  
808 cluster, including populations from western Oklahoma to Arkansas (green). Sample sizes are  
809 presented in parentheses. A) Violin plots resulting by subtracting stable isotope values of  
810 hydrogen in feathers ( $\delta^2\text{H}_f$ ) from stable isotope values of hydrogen in precipitation ( $\delta^2\text{H}_p$ ) at each  
811 sampling site.  $\delta^2\text{H}_{\text{diff}}$  values close to zero indicate molting near the sampling location. The largest  
812  $\delta^2\text{H}_{\text{diff}}$  variation is found in the populations of the Central cluster (green). Samples from sites H  
813 and I could not be genetically assigned with certainty and are represented with two colors (green  
814 and yellow), to indicate that could be grouped to either cluster K2 or cluster K3. B) Map of  
815 hydrogen stable isotope values in precipitation ( $\delta^2\text{H}_p$ ) across the Painted Bunting range and  
816 sampling locations. C) Violin plots of  $\delta^2\text{H}_{\text{diff}}$  values of birds grouped in four distinct clusters  
817 based on genetic membership (K1-4) and for which individual  $\delta^2\text{H}_f$  values were also available.  
818 As shown in panel A, the largest  $\delta^2\text{H}_{\text{diff}}$  variation occurs in the Central cluster populations  
819 (green). A detailed list of samples used to generate the plots in panel A and C is included in the  
820 supplementary material (Table S2 and Table S3).

821  
822  
823  
824  
825  
826  
827  
828  
829  
830  
831

832  
833

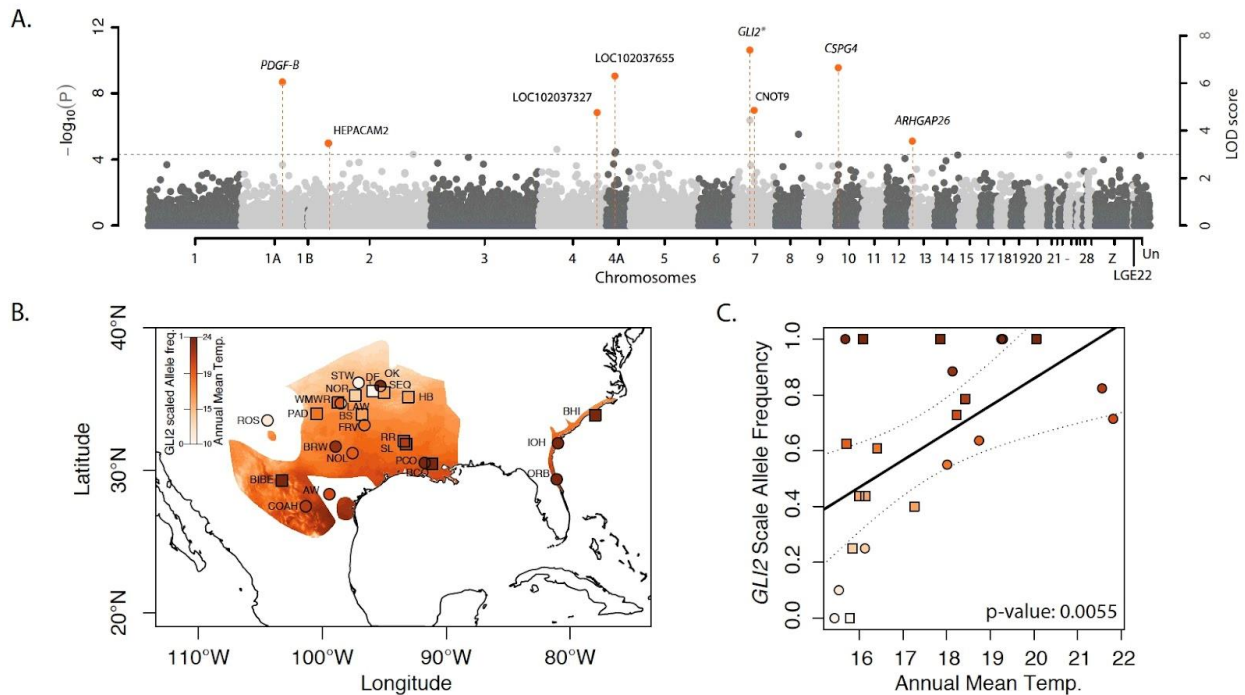

834  
835

836 **Figure 3.** A) Manhattan plot of genome-wide association results of molt-migration behavior  
837 grouping in Painted Buntings using the mrMLM v4.0 software. Orange highlights the candidate  
838 genes around quantitative trait nucleotides (QTNs). Alternating grey and black colors correspond  
839 to alternating chromosomes. (B and C) Correlations between allele frequency and BIO01  
840 (Annual Mean Temperature) for top ranking SNP in *GLI2*. Samples genotyped by RAD-Seq are  
841 represented as squares, and samples genotyped with Fluidigm assays are shown as circles. Site  
842 abbreviations used on the map in panel B and additional sample information are reported in the  
843 supplementary material, Table S4.

844  
845  
846  
847  
848  
849  
850  
851  
852  
853  
854  
855  
856  
857  
858

859 **TABLES**  
860  
861

| site name           | State          | site ID | n  | mean  | sd    | range |
|---------------------|----------------|---------|----|-------|-------|-------|
| St. Catherine Creek | Mississippi    | SCA     | 10 | 24.72 | 2.9   | 10.2  |
| Red River           | Louisiana      | RR      | 7  | 19.49 | 4.75  | 13.6  |
| Bayou Cocodrie      | Louisiana      | CO      | 8  | 25.75 | 4.71  | 14.3  |
| Big Bend            | Texas          | BIBE    | 23 | 18.52 | 6.17  | 23.3  |
| Spanish Lake        | Louisiana      | SL      | 10 | 24.03 | 8.71  | 27.5  |
| Bald Head Island    | North Carolina | NC      | 20 | 25.92 | 7.38  | 29.8  |
| Biological Station  | Oklahoma       | BS      | 13 | 21.79 | 9.27  | 32.4  |
| Holla Bend          | Arkansas       | HB      | 14 | 20.43 | 10.09 | 33.5  |
| Deep Fork           | Oklahoma       | DF      | 10 | 9.24  | 13.49 | 45.5  |
| Wichita Mountain    | Oklahoma       | WMWR    | 15 | 32.97 | 17.41 | 52.7  |
| Sequoyah            | Oklahoma       | SEQ     | 15 | 11.55 | 12.2  | 53.5  |
| Norman              | Oklahoma       | NOR     | 21 | 29.89 | 11.62 | 55.4  |

862  
863  
864  
865 **Table 1.** Summary table of  $\delta^2\text{H}_{\text{diff}}$  range variation across sites, including sample size (n), mean  
866 and standard deviation. At each site, the  $\delta^2\text{H}_{\text{diff}}$  index was calculated by subtracting stable isotope  
867 values of hydrogen in feathers ( $\delta^2\text{H}_f$ ) from stable isotope values of hydrogen in precipitation  
868 ( $\delta^2\text{H}_p$ ). Smaller  $\delta^2\text{H}_{\text{diff}}$  ranges (close to zero) indicate molting near the sampling location. The  
869 largest  $\delta^2\text{H}_{\text{diff}}$  variation is found in the populations of the Central cluster (the last six sites at the  
870 bottom of the table from BS to NOR).

871  
872  
873  
874  
875  
876  
877

| Chromosome | Marker position (bp) | Gene name    | Region       | Distance to Region (bp) | GEMMA Effect size | FASTmrMLM  |           |           |        | Function                                                                                                                                        |
|------------|----------------------|--------------|--------------|-------------------------|-------------------|------------|-----------|-----------|--------|-------------------------------------------------------------------------------------------------------------------------------------------------|
|            |                      |              |              |                         |                   | QTN effect | LOD score | -log10(P) | r2 (%) |                                                                                                                                                 |
| 7          | 15411182             | GLI2         | intron 12    | 0                       | 0.12              | 0.87       | 7.40      | 8.27      | 24.82  | Functions as transcription regulator in the hedgehog (Hh) pathway                                                                               |
| 10         | 3306352              | CSPG4        | exon 7       | 0                       | na                | -0.35      | 6.65      | 7.51      | 11.55  | Stimulates endothelial cells motility during microvascular morphogenesis. Cell surface receptor for collagen alpha 2(VI)                        |
| 4A         | 8965887              | LOC102037655 | intron 2     | 0                       | 0.09              | -0.29      | 6.30      | 7.15      | 7.65   | Protein FAM162B-like                                                                                                                            |
| 1A         | 50451000             | PDGF-B       | Regulatory 1 | 2502                    | na                | -0.28      | 6.04      | 6.87      | 5.30   | Platelet derived growth factor                                                                                                                  |
| 7          | 18951233             | CNOT9        | intron 3     | 0                       | na                | -0.34      | 4.86      | 5.65      | 7.81   | Signal transduction as well as retinoic acid-regulated cell differentiation and development                                                     |
| 4          | 61598757             | LOC102037327 | Regulatory 2 | 34311                   | na                | -0.41      | 4.77      | 5.55      | 9.48   | C-C motif chemokine 3-like                                                                                                                      |
| 13         | 1369943              | ARHGAP26     | intron 1     | 0                       | na                | 0.34       | 3.56      | 4.29      | 7.51   | Triggers cell surface receptors to begin signaling cascades that regulate the organization of the actin-cytoskeleton                            |
| 2          | 30058845             | HEPACAM2     | Regulatory 2 | 0                       | 0.07              | na         | na        | na        | na     | Immunoglobulin superfamily regulating mitosis. Knockdown of this gene results in prometaphase arrest, abnormal nuclear morphology and apoptosis |

878  
879  
880  
881  
882  
883  
884  
885  
886  
887  
888  
889  
890  
891  
892  
893  
894  
895  
896  
897  
898  
899  
900  
901  
902  
903  
904

**Table 2.** Candidate genes identified in two GWAS analyses. Chromosome and position, gene name and region and distance to region, and parameters estimated using the two GWAS methods (single gene effects: *bslmm* and multigene effects: FASTmrMLM), with their effect sizes, and functional annotation.

| Chrom | Marker position (bp) | GeoFor_1.0 version 102 annotation | Region       | Distance (bs) | Lon | Lat         | $\delta^2\text{H}$ | BIO01       | BIO13 | BIO15      | NDVI (sd)  |
|-------|----------------------|-----------------------------------|--------------|---------------|-----|-------------|--------------------|-------------|-------|------------|------------|
| 1A    | 50451000             | PDGF-B                            | regulatory 1 | 2502          | ns  | ns          | <b>-0.6</b>        | ns          | ns    | ns         | ns         |
| 4     | 61598757             | LOC102037327                      | regulatory 2 | 34311         | ns  | ns          | ns                 | ns          | ns    | ns         | ns         |
| 4A    | 8965887              | LOC102037655                      | intron 2     | 0             | ns  | ns          | <b>-0.7</b>        | ns          | ns    | ns         | ns         |
| 7     | 15411182             | GLI2                              | intron 12    | 0             | ns  | <b>-0.6</b> | <b>0.6</b>         | <b>0.7</b>  | ns    | ns         | ns         |
| 7     | 18951233             | CNOT9                             | intron 3     | 0             | ns  | <b>0.6</b>  | ns                 | <b>-0.8</b> | ns    | ns         | ns         |
| 10    | 3306352              | CSPG4                             | exon 7       | 0             | ns  | ns          | ns                 | <b>0.6</b>  | ns    | <b>0.7</b> | ns         |
| 13    | 1369943              | ARHGAP26                          | intron 1     | 0             | ns  | ns          | <b>0.6</b>         | ns          | ns    | ns         | <b>0.6</b> |

905  
906  
907  
908  
909  
910  
911  
912  
913  
914  
915  
916  
917  
918  
919  
920  
921  
922  
923  
924  
925  
926  
927  
928  
929  
930  
931  
932  
933  
934  
935  
936  
937  
938  
939  
940  
941  
942  
943

**Table 3.** Correlation of top candidate genes (allele frequencies) identified in FASTmrMLM and the *bslmm* model with Longitude, Latitude, hydrogen stable isotope, and the top ranked environmental variables identified in the gradient forest analyses (BIO01, BIO13, BIO15, NDVIstd).



944 **Supplementary Figures**

945  
946  
947  
948

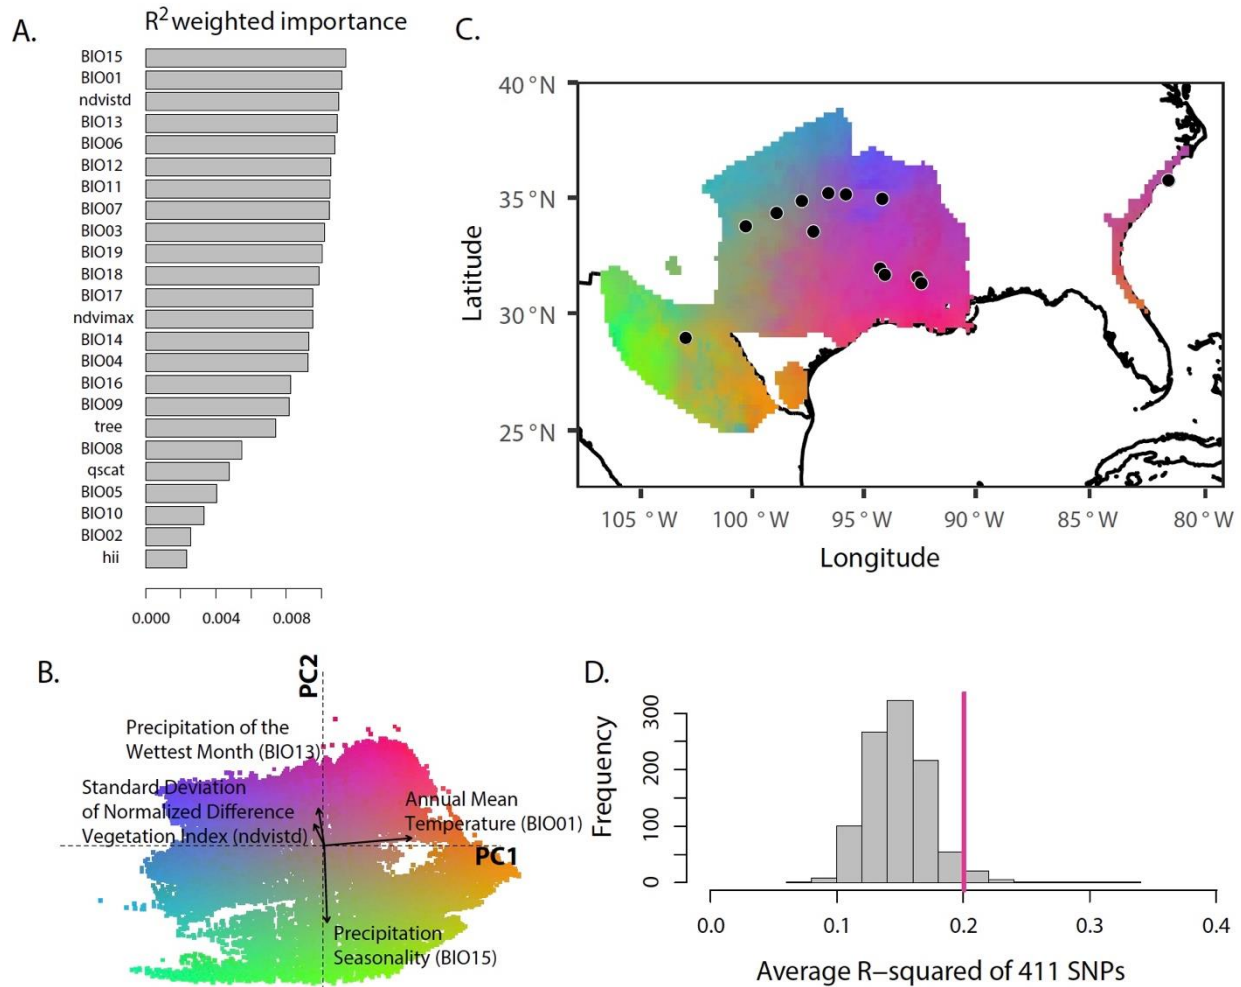

949  
950

951 **Figure S1. Mapping gene-environment correlations of molt-migration phenotype across**  
952 **the Painted Bunting breeding range.** (A) Top ranked environmental variables underlying molt-  
953 migration genotypes. (B) Principal components analysis of gradient forest transformed climate  
954 variables. Colors are based upon modelled gene-environment correlations from 100 000 random  
955 points across the breeding range. Arrows show the loadings of the top-ranked uncorrelated  
956 environmental variables. (C) Gradient forest-transformed climate variables from the PCA  
957 mapped to geography support climate adaptation across the breeding range. Black dots  
958 designating approximate population locations. (D) Histogram of  $R^2$  of 1000 gradient forest runs  
959 of environmental variable randomizations demonstrates the variables BIO15, BIO01, BIO13 and  
960 NDVIstd are significantly correlated to the candidate molt-migration genetic variation (pink line  
961 is average  $R^2$  of real data).  
962

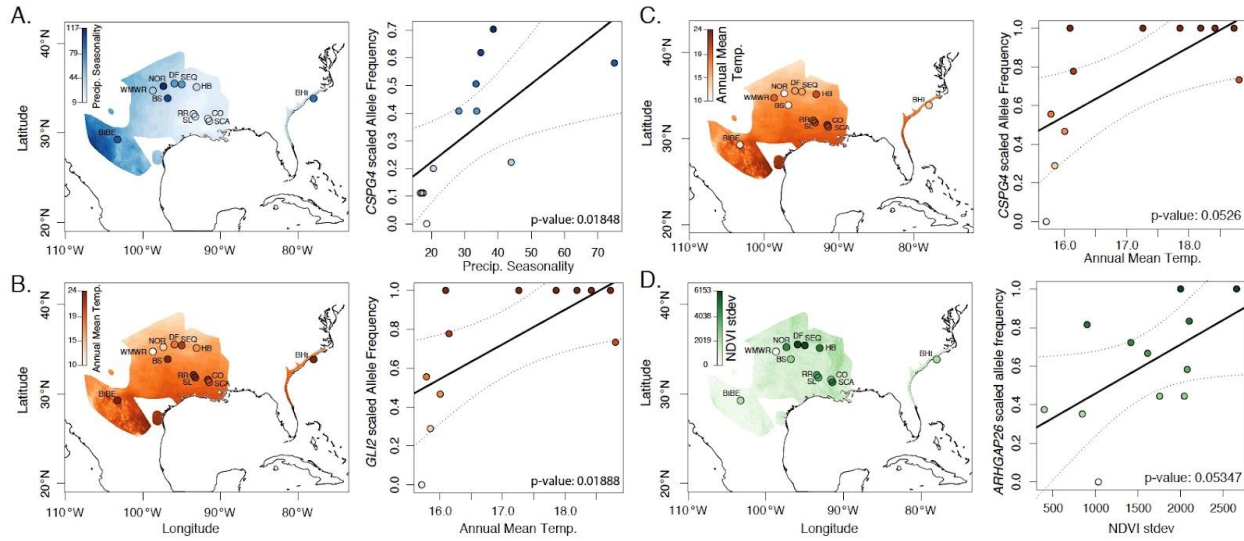

963  
964

965 **Figure S2.** Statistical association of A) *CSPG4* allele frequency with BIO15 (Precipitation  
966 Seasonality) and B) *GLI2* allele frequency with BIO01 (Annual Mean Temperature) across 13  
967 populations sequenced with RAD-Seq. There was moderate association of C) *CSPG4* allele  
968 frequency and BIO01 (Annual Mean Temp) and D) *ARHGAP26* with NDVIstd (variation in  
969 Productivity).

970

971

972

973

974

975

976

977

978

979

980

981

982

983 **Supplementary Tables**

984

985 **Table S1.** RAD-Seq sampling locations with Latitude, Longitude, number of individuals  
986 sequenced before filtering for missingness ( $N_{\text{RAD\_nofilter}}$ ), the number of individuals retained after  
987 filtering ( $N_{\text{RAD\_filter}}$ ), and number of individuals for which stable isotope analysis defined molt-  
988 migration phenotype ( $N_{\text{Phenotyped}}$ ) .

989

990 **Table S2.** List of samples used for generating the population violin plots in Fig 2 – panel A.

991

992

993 **Table S3.** List of samples used for generating the cluster violin plots in Fig 2 – panel C.

994

995 **Table S4.** Number of Painted Buntings successfully screened at the *GLI2* locus at each location  
996 across the species breeding range. Site ID correspond to the map code of breeding populations in  
997 Fig. 3.
